# Supplementary material for: Impact of health portal enrolment with email reminders at an academic rheumatology clinic
Source: PubMed Central journal article supplement — BMJ Qual Improv Rep. 2017 Mar 7;6(1):u214811.w5926. doi: 10.1136/bmjquality.u214811.w5926 (PMC5348589; doi:10.1136/bmjquality.u214811.w5926), 2017-03-07
Supplement: bmjqir.u214811.w5926supp.pdf [file bmjqir.u214811.w5926supp.pdf]

Figure 1 (Supplemental): Recruitment summary for no-show patient telephone interviews

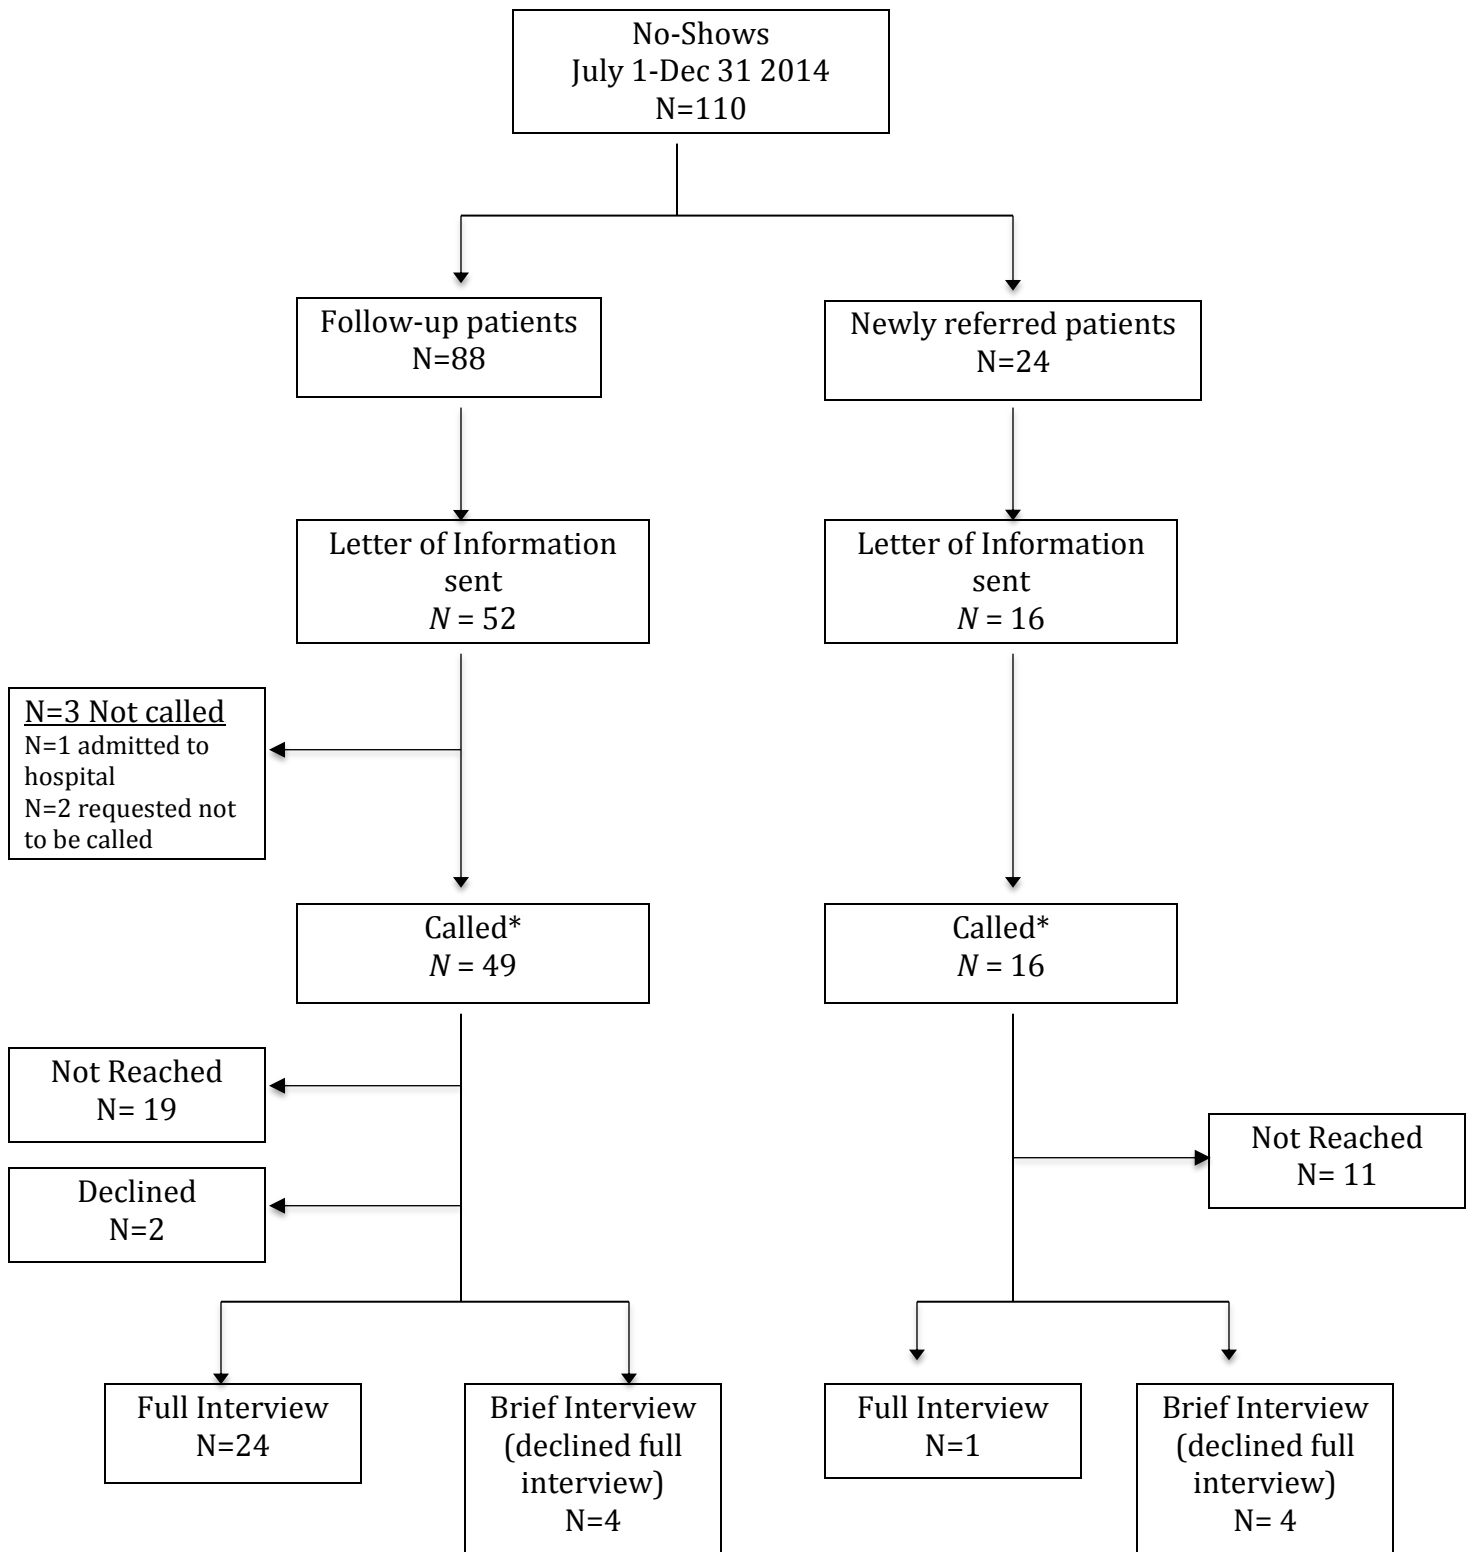

\*Interviews attempted within 2 weeks of the missed appointment

**Figure 4 (Supplemental): MyChart enrollment**

Interventions to increase MyChart enrollment began mid-November 2014, and patients were surveyed in the waiting room between February and September 2015 about whether they had a MyChart account.

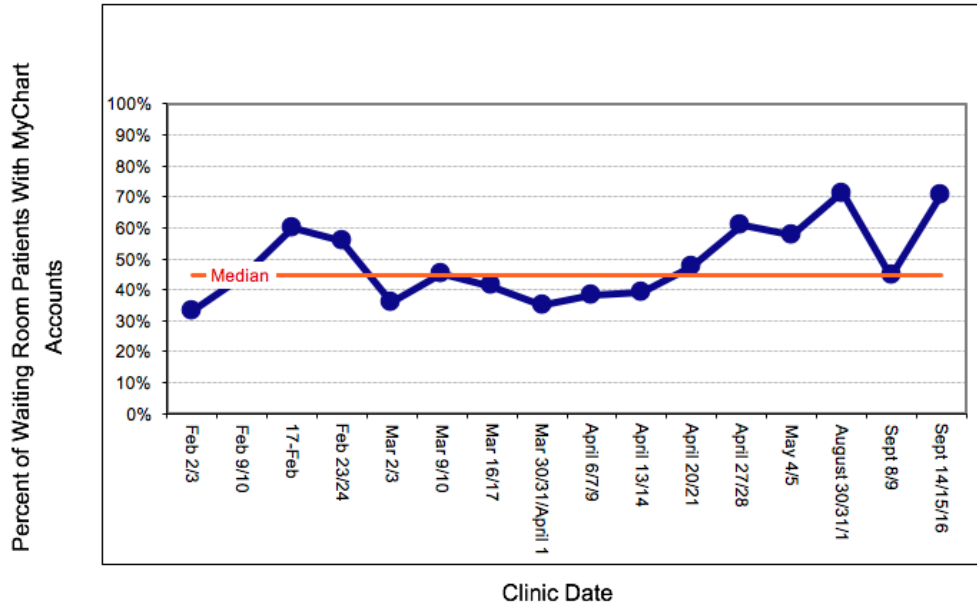

**Figure 5 (Supplemental): MyChart enrolment**

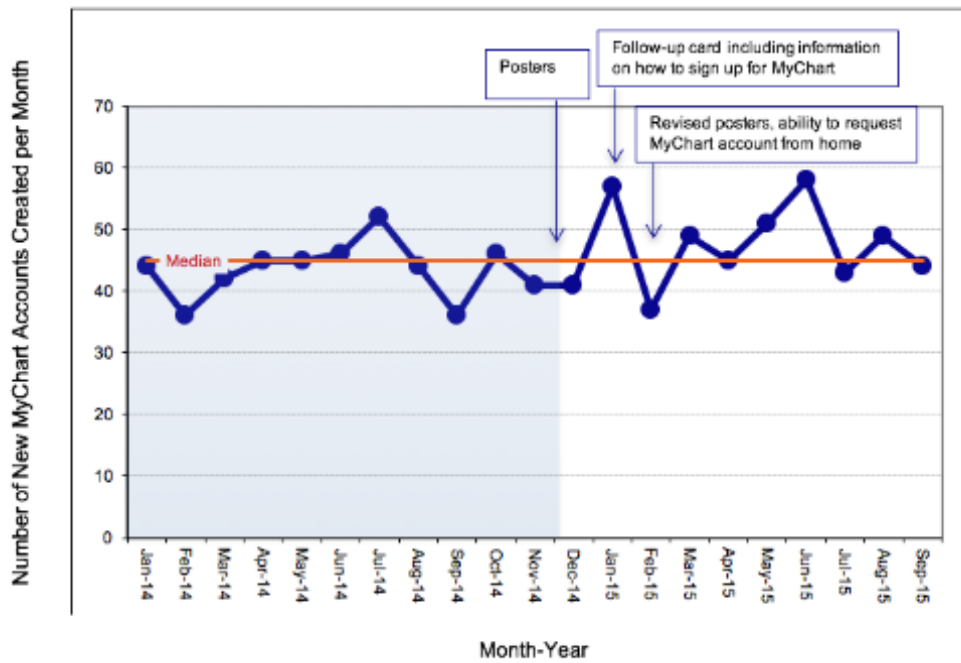

Figure 8 (Supplemental): Waiting Room Survey

**Waiting Room Survey for New & Returning Patients**

**1. How did you know about today's appointment? (select all that apply)**

Made appointment at last visit       Phone conversation with the office  
 Letter from this office                       Looked online in MyChart  
 Other \_\_\_\_\_

**2. Do you have a MyChart Account?**

Yes       No       Don't know

**If yes, did you receive an email reminder about today's appointment?**

Yes       No       Don't know

**Did you find the email reminder helpful?**

Yes       No       Don't know

**4. Do you have any comments or suggestions for the clinic regarding appointment scheduling/reminders?**

---

---

Thank you for completing the survey, we appreciate your feedback.



Table 1 (Supplemental): Baseline characteristics of No-Shows

| <b>Follow-up patient Characteristics (n=86)</b>          | <b>Mean (95% CI) or proportion n (%)</b> |
|----------------------------------------------------------|------------------------------------------|
| <b>Age mean (95% CI)</b>                                 | 55.1 (51.5–58.8)                         |
| <b>Female - n (%)</b>                                    | 60 (69.8)                                |
| <b>Enrolled in MyChart™ - n (%)</b>                      | 22 (25.5)                                |
| <b>Time since last appointment, months mean (95% CI)</b> | 4.8 (4.1–5.5)                            |
| <b>Diagnosis - n (%)</b>                                 |                                          |
| Spondyloarthropathy                                      | 19 (22.1)                                |
| Rheumatoid Arthritis                                     | 16 (18.6)                                |
| Osteoarthritis                                           | 13 (15.1)                                |
| Crystal arthritis                                        | 8 (9.3)                                  |
| Vasculitis                                               | 8 (9.3)                                  |
| Non-inflammatory MSK Condition                           | 7 (8.1)                                  |
| Systemic Lupus Erythematosus                             | 6 (7.0)                                  |
| Other Connective Tissue Disease                          | 4 (4.7)                                  |
| Sarcoidosis                                              | 3 (3.5)                                  |
| SAPHO                                                    | 1 (1.2)                                  |
| <b>Disease duration, years mean (95% CI)</b>             | 5.4 (3.7 – 7.1)                          |
| <b>Disease therapy - n (%)</b>                           |                                          |
| DMARD(s)                                                 | 32 (37.2)                                |
| Biologic agent                                           | 4 (4.7)                                  |
| DMARD(s) + Biologic agent                                | 5 (5.8)                                  |
| Prednisone                                               | 14 (16.3)                                |
| NSAID                                                    | 18 (20.9)                                |
| Xanthine Oxidase Inhibitor                               | 4 (4.7)                                  |
| <b>Regular laboratory monitoring - n (%)</b>             | 45 (52.3)                                |
| <b>Disease activity at last visit - n (%)</b>            |                                          |
| No symptoms/remission                                    | 23 (26.7)                                |
| Minimal/mild symptoms, low disease activity              | 29 (33.7)                                |
| Severe symptoms or active disease                        | 24 (27.9)                                |
| Unknown                                                  | 10 (11.6)                                |
| <b>General Health Status - n (%)</b>                     |                                          |
| ≥ 4 medical co-morbidities                               | 19 (22.1)                                |
| Abnormal labs in last 6 months                           | 25 (29.1)                                |
| Hospitalization or Emergency visit last 6 months         | 8 (9.3)                                  |
| <hr/>                                                    |                                          |
| <b>New patient characteristics (n=24)</b>                | <b>Mean (95% CI) or proportion n (%)</b> |
| <b>Age mean (95% CI)</b>                                 | 51.9 (43.5–60.4)                         |
| <b>Female - n (%)</b>                                    | 20 (83.3)                                |
| <b>Days since referral mean (95% CI)</b>                 | 101.9 (60.8–143.1)                       |
| <b>Distance from clinic (km) mean (95% CI)</b>           | 13.9 (8.6–19.2)                          |
| <b>Reason for referral n (%)</b>                         |                                          |
| Unknown diagnosis                                        | 12 (50.0)                                |
| OA/degenerative MSK condition                            | 4 (33.3)                                 |
| Fibromyalgia                                             | 3 (12.5)                                 |
| Crystal arthritis                                        | 3 (12.5)                                 |
| Known inflammatory arthritis                             | 2 (8.3)                                  |
| <b>Referral source n (%)</b>                             |                                          |
| Family Doctor                                            | 16 (62.5)                                |
| Specialist                                               | 8 (33.3)                                 |
| Emergency Department                                     | 1 (4.1)                                  |
